# Supplementary material
Source: PubMed Central journal article supplement (PMC7781661)

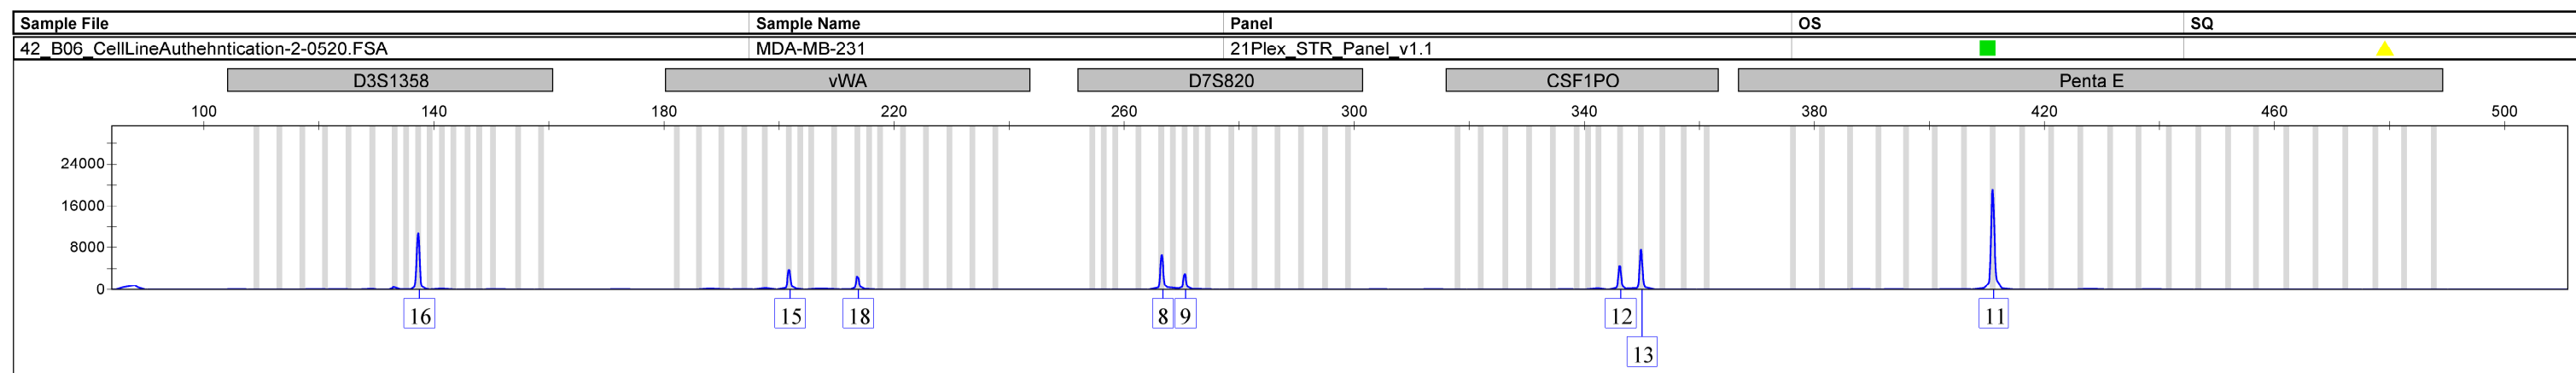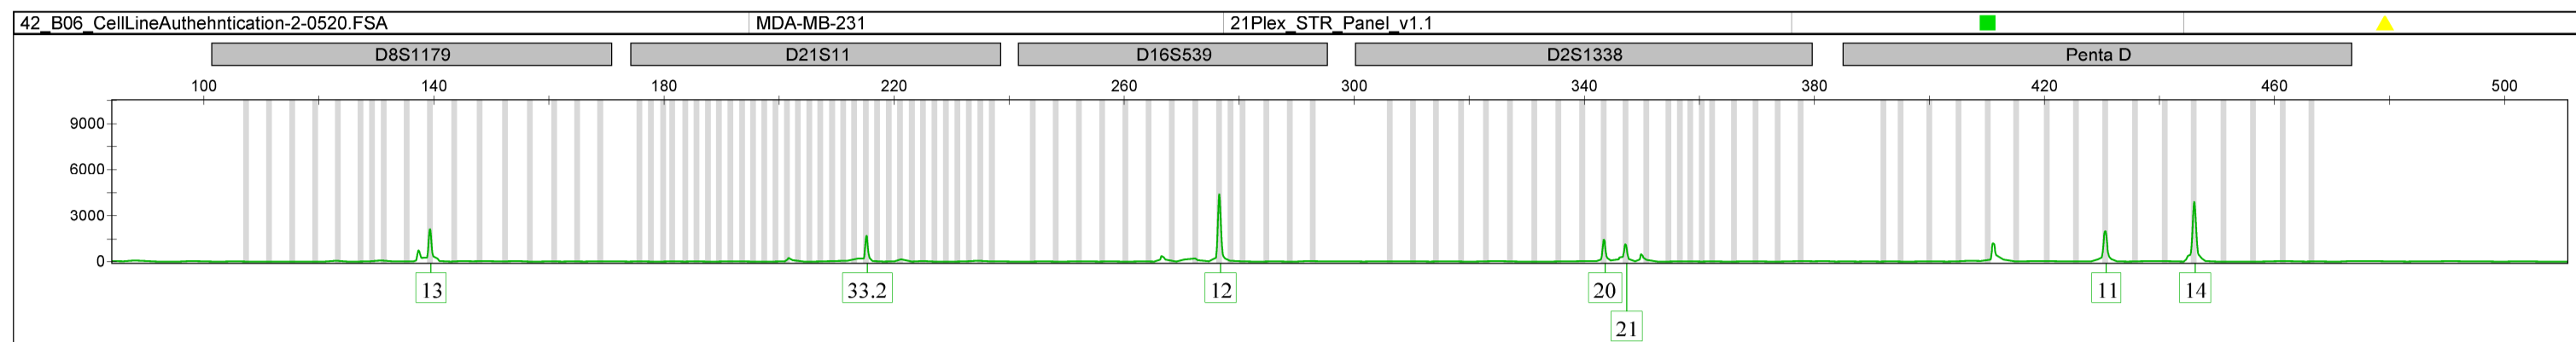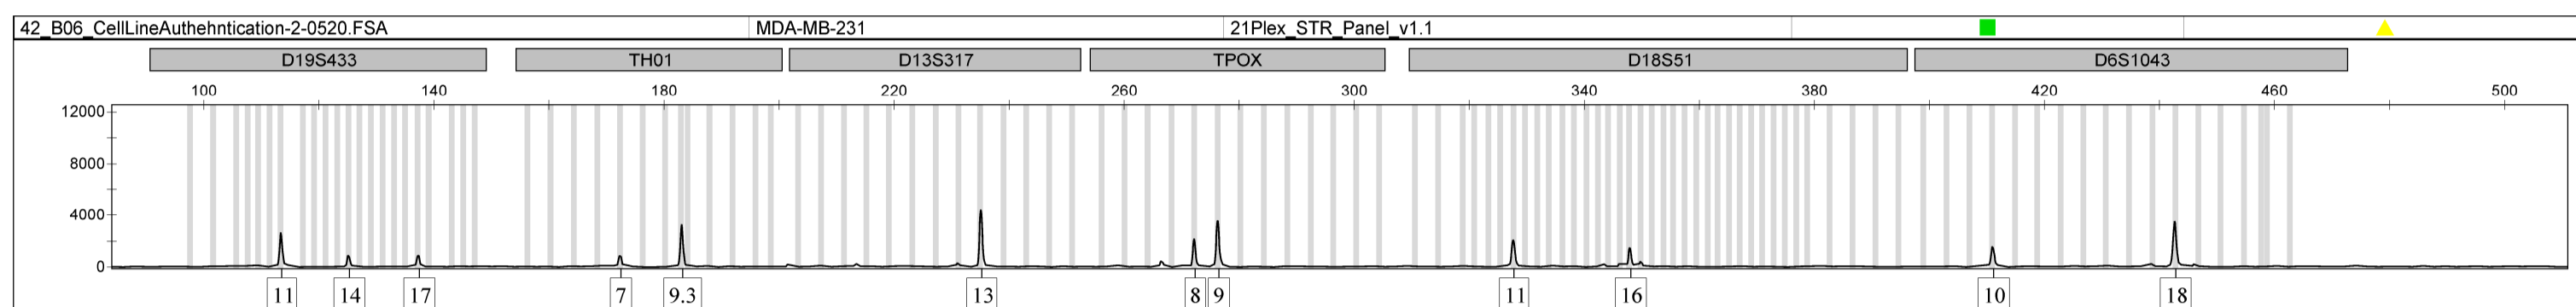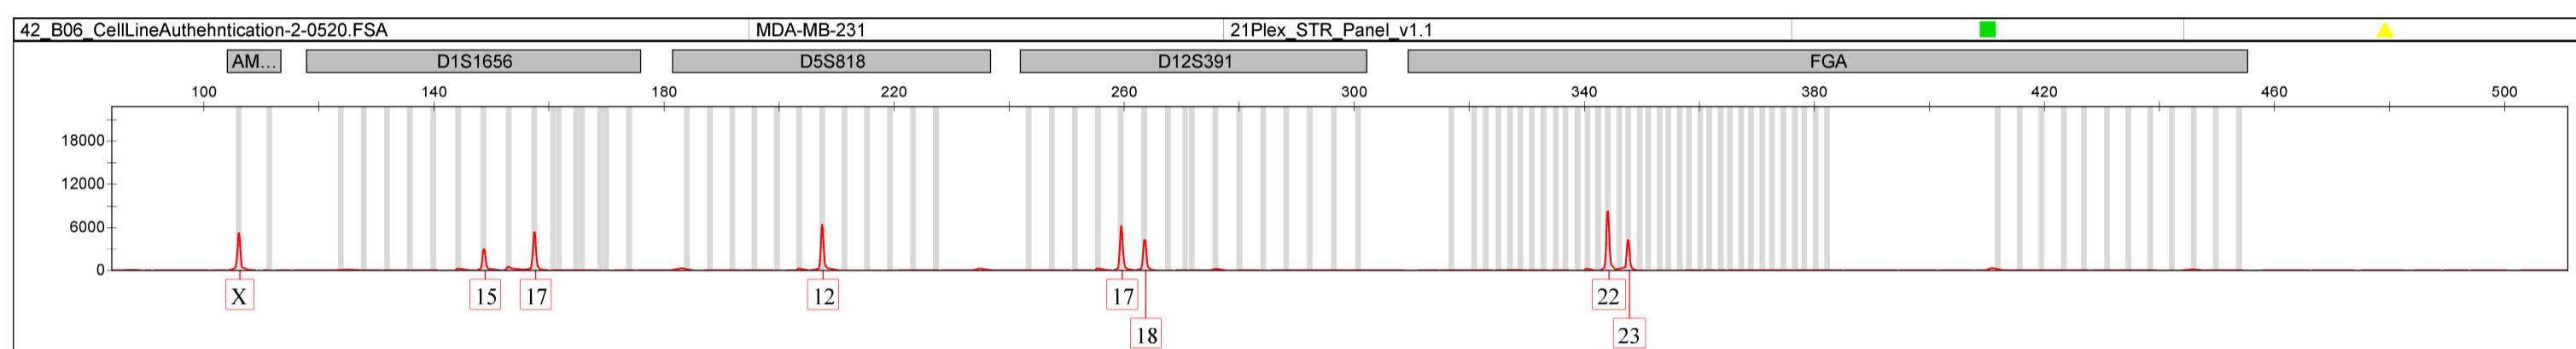

Supplement: KCCY_A_1850969_SM6788.pdf [file KCCY_A_1850969_SM6788.pdf]
